# Supplementary material for: A Tomato Putative Metalloprotease SlEGY2 Plays a Positive Role in Thermotolerance
Source: MDPI journal article supplement (doi:10.3390/agriculture12070940), 2022-06-29
Supplement: s1 [file s1]

**Table S1** Primers used in this study.

| Name             | Sequence (5'-3')            |
|------------------|-----------------------------|
| SIEGY2-AF        | GTCGACATGAACATAACCGGCGGTTCT |
| SIEGY2-AR        | TCTAGACTAGAGAGCAGGTTGATTAGA |
| SIEGY2-GFP-F     | GGTACCATGAACATAACCGGCGGTTCT |
| SIEGY2-GFP-R     | TCTAGAGAGAGCAGGTTGATTAGAGA  |
| SIEGY2-qRT-F     | CAGGAGAGCTTGATGGTGGT        |
| SIEGY2-qRT-R     | ACTTCTTCTGATAGTGGAGC        |
| EF-1 $\alpha$ -F | GGAAGTTGAGAAGGAGCCTAAG      |
| EF-1 $\alpha$ -R | CAACACCAACAGCAACAGTCT       |
| 35S              | GACGCACAATCCCACTATCC        |

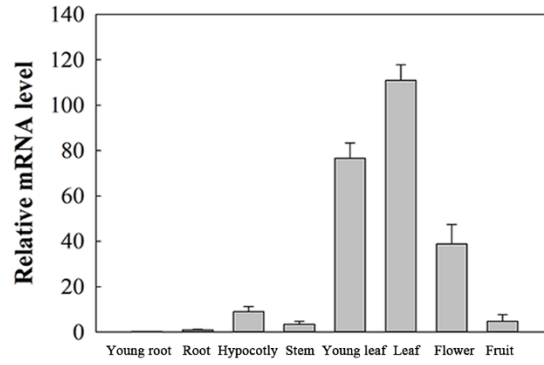

**Figure S1.** The expression level of SIEGY2 in different tissues.

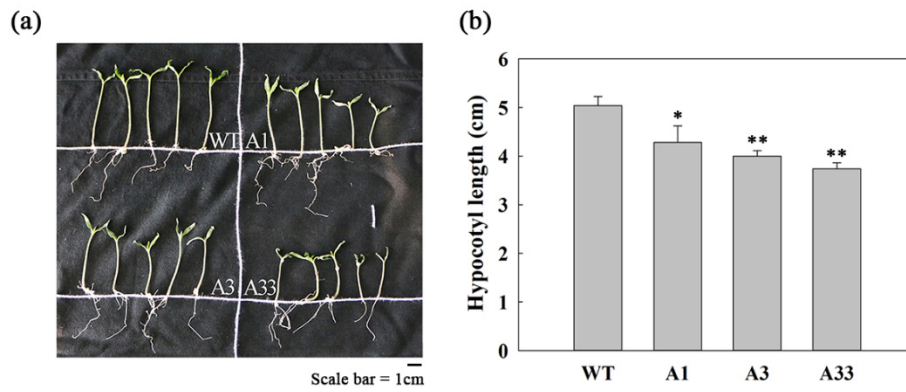

**Figure S2.** The phenotype of WT and AS young seedlings. The phenotype of hypocotyl (a) and the statistical analysis of the length of hypocotyl (b) in WT and AS lines.

|            |                                           |     |
|------------|-------------------------------------------|-----|
| AtEGY2.seq | MNLAVASFRGNFGVLSQCSSCCSLQFQPFVPAATSSLNHGQ | 40  |
| SlEGY2.seq | .....MNIPAVLPCSEN                         | 13  |
| Consensus  | a f                                       |     |
| AtEGY2.seq | TGTSRRKKDKIERVERKRETLVRVTETQTEFGNDDN      | 80  |
| SlEGY2.seq | LQCSTPPAHLIRLVIRKKGRILWCRLSHDNNKEDDSVQDN  | 52  |
| Consensus  | s l l v r k l v e dn                      |     |
| AtEGY2.seq | KEGKESSADDEPTKIPTLNSQSTVWNEAFGNEENKACF    | 120 |
| SlEGY2.seq | NNNSHQDNDCLENTSLENN.DGPQINGLTGFEDDTDCL    | 91  |
| Consensus  | d p e n n g e q                           |     |
| AtEGY2.seq | SSQDGDKLEVSSGSPLPGVNVSIHVIYKDDSIMFSGCL    | 160 |
| SlEGY2.seq | ASE.....SPLPGV.....                       | 100 |
| Consensus  | s splpgv                                  |     |
| AtEGY2.seq | SFIKSCCECHQLDDSMRLPKETIILRGQVFGFDTFFVT    | 200 |
| SlEGY2.seq | .....KECQLDESIRIPKETVEILRNQVFGFDTFFVT     | 132 |
| Consensus  | p qld s r pkt ilr qvfgfdtffvt             |     |
| AtEGY2.seq | SQEPYEGGVLFKGNLRGKPAISYEKIKTRMENNFGDQYKL  | 240 |
| SlEGY2.seq | SQEPYEGGVLFKGNLRGQPAKTYEKVSKRMQ.....      | 163 |
| Consensus  | sqepyeggvlfkgnlrg a yek rm                |     |
| AtEGY2.seq | FLLTNPEDDKPVAVVVPRRSLPETTAVPEWFAAGSFGVLV  | 280 |
| SlEGY2.seq | .....DDKPVAVVVPRMILCPETTAVPEWFAAGSFGVLV   | 196 |
| Consensus  | ddkpavvvpr l pettavpewfaag fglv           |     |
| AtEGY2.seq | ALFTLFLRNVPALQSDILSAFDNIELLKDGLPGALVTALV  | 320 |
| SlEGY2.seq | TVFTLFLRNVPALQSNFLSVFDNIELLKDGLPGALMTAFL  | 236 |
| Consensus  | ftlflrnvpalqs ls fdnl llkdglpgal ta       |     |
| AtEGY2.seq | LGVHELGHILVANSIGIKLGVEFVPSWQIGSFGAITRIK   | 360 |
| SlEGY2.seq | LGVHEVSPRLVATEVGIKLSIFVPSWQIGCFGAITRIL    | 276 |
| Consensus  | lgvhe h lva gikl p fvpwqig fgaitri        |     |
| AtEGY2.seq | NIVAKREDLLKVAAAGPLAGFSTGILFLIGLFVPPSDGI   | 400 |
| SlEGY2.seq | NVVPNRREDLLKVAAAGPLAGFCVGFILLISGFMLIPSDGI | 316 |
| Consensus  | n v redllkvaaagplagf g il l g ppsdgi      |     |
| AtEGY2.seq | GVVVDASVFHESFLAGGIAKILGLDALKEGTSISLNPLVI  | 440 |
| SlEGY2.seq | GIIIVDFSVFHESFLAGGIAKILGLVILQEGSPISVPLVI  | 356 |
| Consensus  | g vd svfhesflaggiakl lgd l eg is plvi     |     |
| AtEGY2.seq | WAWAGLLINGINSIPAGELDGGKIAFSIWGRKTATRTGA   | 480 |
| SlEGY2.seq | WAWAGLVININSIPAGELDGGRIAFAMWGRKASARISAL   | 396 |
| Consensus  | wawagl in insipageldgg iaf wgrk rl        |     |
| AtEGY2.seq | SIALLGLSALESDVAFYWVVLIFFLQRGPIAPLAEDITVP  | 520 |
| SlEGY2.seq | SIGLLGICSLENDVAFYWVVLIFFLQRGPIAPLSEEVTHP  | 436 |
| Consensus  | si llg lf dvafywvvlifflqrgpiapl ee t p    |     |
| AtEGY2.seq | DDKYVSLGILVLFISLLVCLPYPFETGNEAMMIG        | 555 |
| SlEGY2.seq | QNKYMALGVVLFILGLLVCLPYPFESNQPAL...        | 468 |
| Consensus  | ky lg vlfl llvclpypf f a                  |     |

Figure S3. Amino acid sequence alignment of AtEGY2 and SlEGY2.
